# Supplementary material for: Netrin-4 as a biomarker promotes cell proliferation and invasion in gastric cancer
Source: PubMed Central journal article supplement (PMC4496398; doi:10.18632/oncotarget.3400), 2015-03-18
Supplement: oncotarget-06-9794-s001.pdf [file oncotarget-06-9794-s001.pdf]

SUPPLEMENTARY FIGURES AND TABLE

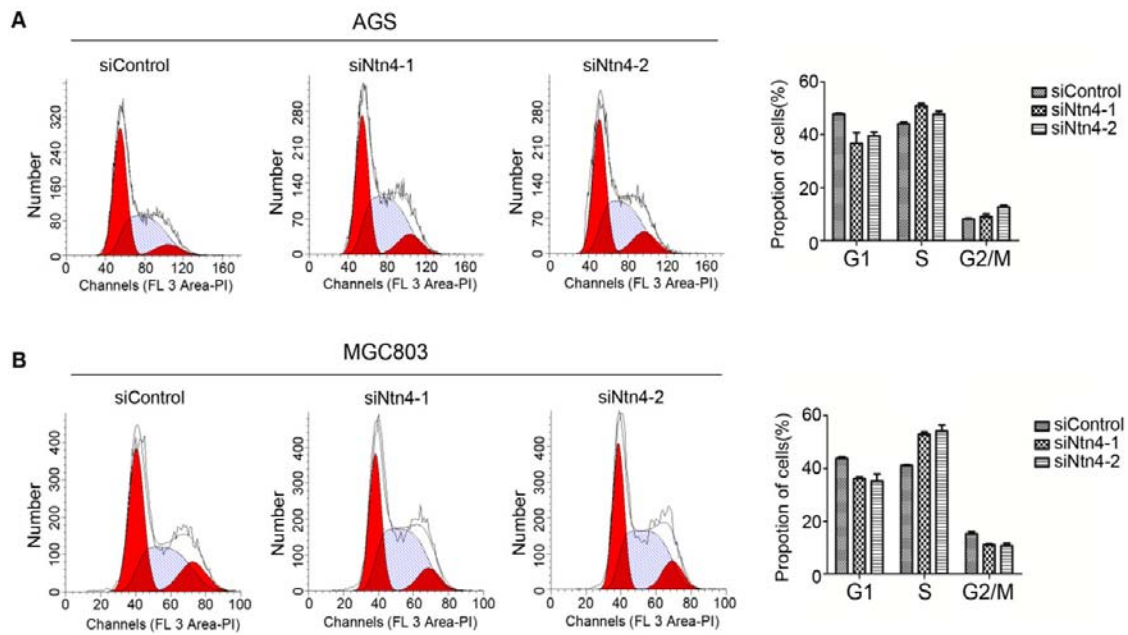

**Supplementary Figure S1: Ntn4 silencing had little effect on cell cycle.** AGS (A) and MGC803 (B) were transfected with siControl or siNtn4-1/2 for 48 hours and subjected to PI staining and FACS analysis to determine cell cycle profile.

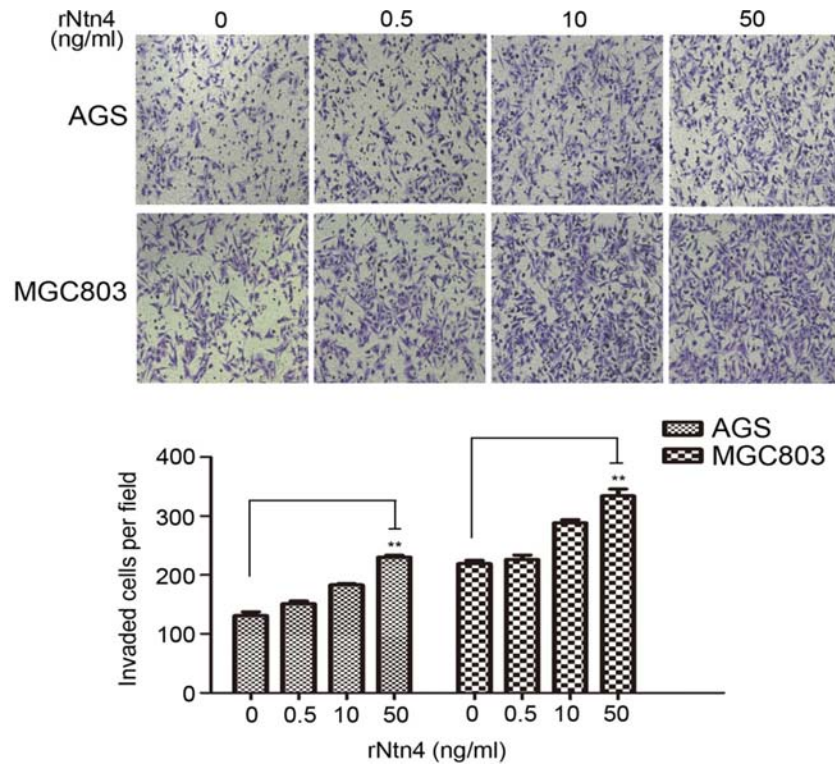

**Supplementary Figure S2: Recombinant Ntn4 promoted cell invasion in a dose-dependent manner.** AGS and MGC803 cells were cultured in the presence of recombinant Ntn4 with the indicated concentrations for 48 hours and then subjected to invasion assay. Magnification,  $\times 100$ . Mean  $\pm$  SEM,  $n \geq 3$ . \*\* $p < 0.01$ .

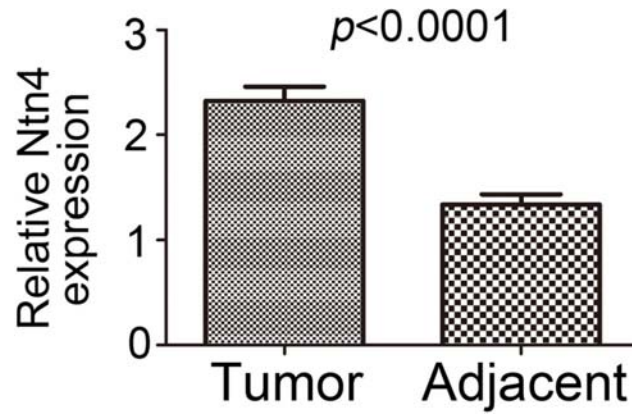

**Supplementary Figure S3: Ntn4 was significantly up-regulated in GC tumor tissues from the patients with the early stage.** In the patients with the early stage of GC which means TNM I and II stage, Ntn4 was significantly up-regulated in tumor tissues compared with the adjacent tissues by IHC staining. Mean  $\pm$  SEM.  $n = 37$ ,  $p < 0.001$ .

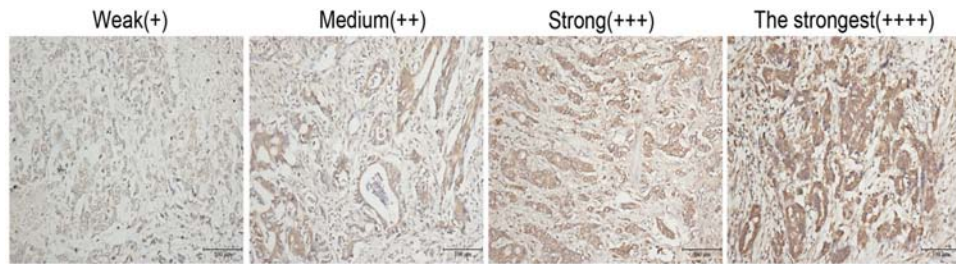

**Supplementary Figure S4: Classification of samples according to the intensity of staining of Neo expression in GCs. Magnification,  $\times 200$ . ( $n = 36$ ).**

**Supplementary Table S1. Clinicopathologic correlation of Ntn4 expression in 82 tumor tissues from gastric cancer patients**

| Characteristic | n  | Ntn4 |    |     |    | p Value |
|----------------|----|------|----|-----|----|---------|
|                |    | I    | II | III | IV |         |
| Sex            |    |      |    |     |    | 0.132   |
| Male           | 56 | 7    | 17 | 20  | 12 |         |
| Female         | 26 | 0    | 12 | 11  | 3  |         |
| Age(years)     |    |      |    |     |    | 0.209   |
| ≤ 55           | 25 | 4    | 10 | 9   | 2  |         |
| > 55           | 57 | 3    | 19 | 22  | 13 |         |
| Tumor size(cm) |    |      |    |     |    | 0.741   |
| ≤ 5            | 53 | 5    | 17 | 22  | 9  |         |
| > 5            | 29 | 2    | 12 | 9   | 6  |         |
| Stage          |    |      |    |     |    | 0.008*  |
| I              | 13 | 1    | 5  | 4   | 3  |         |
| II             | 24 | 3    | 16 | 4   | 1  |         |
| III            | 39 | 2    | 6  | 21  | 10 |         |
| IV             | 6  | 1    | 2  | 2   | 1  |         |
| Recurrence     |    |      |    |     |    | 0.167   |
| With           | 34 | 2    | 15 | 9   | 8  |         |
| Without        | 21 | 4    | 5  | 8   | 4  |         |
| NA             | 27 | 1    | 9  | 14  | 3  |         |

\* $p < 0.05$  was considered statistically significant.

NA: data not available
